# Supplementary material
Source: publisher site journal article supplement (https://www.dovepress.com/article/459706)
Supplement: Supplementary file 1 [file get_supplementary_file.php]

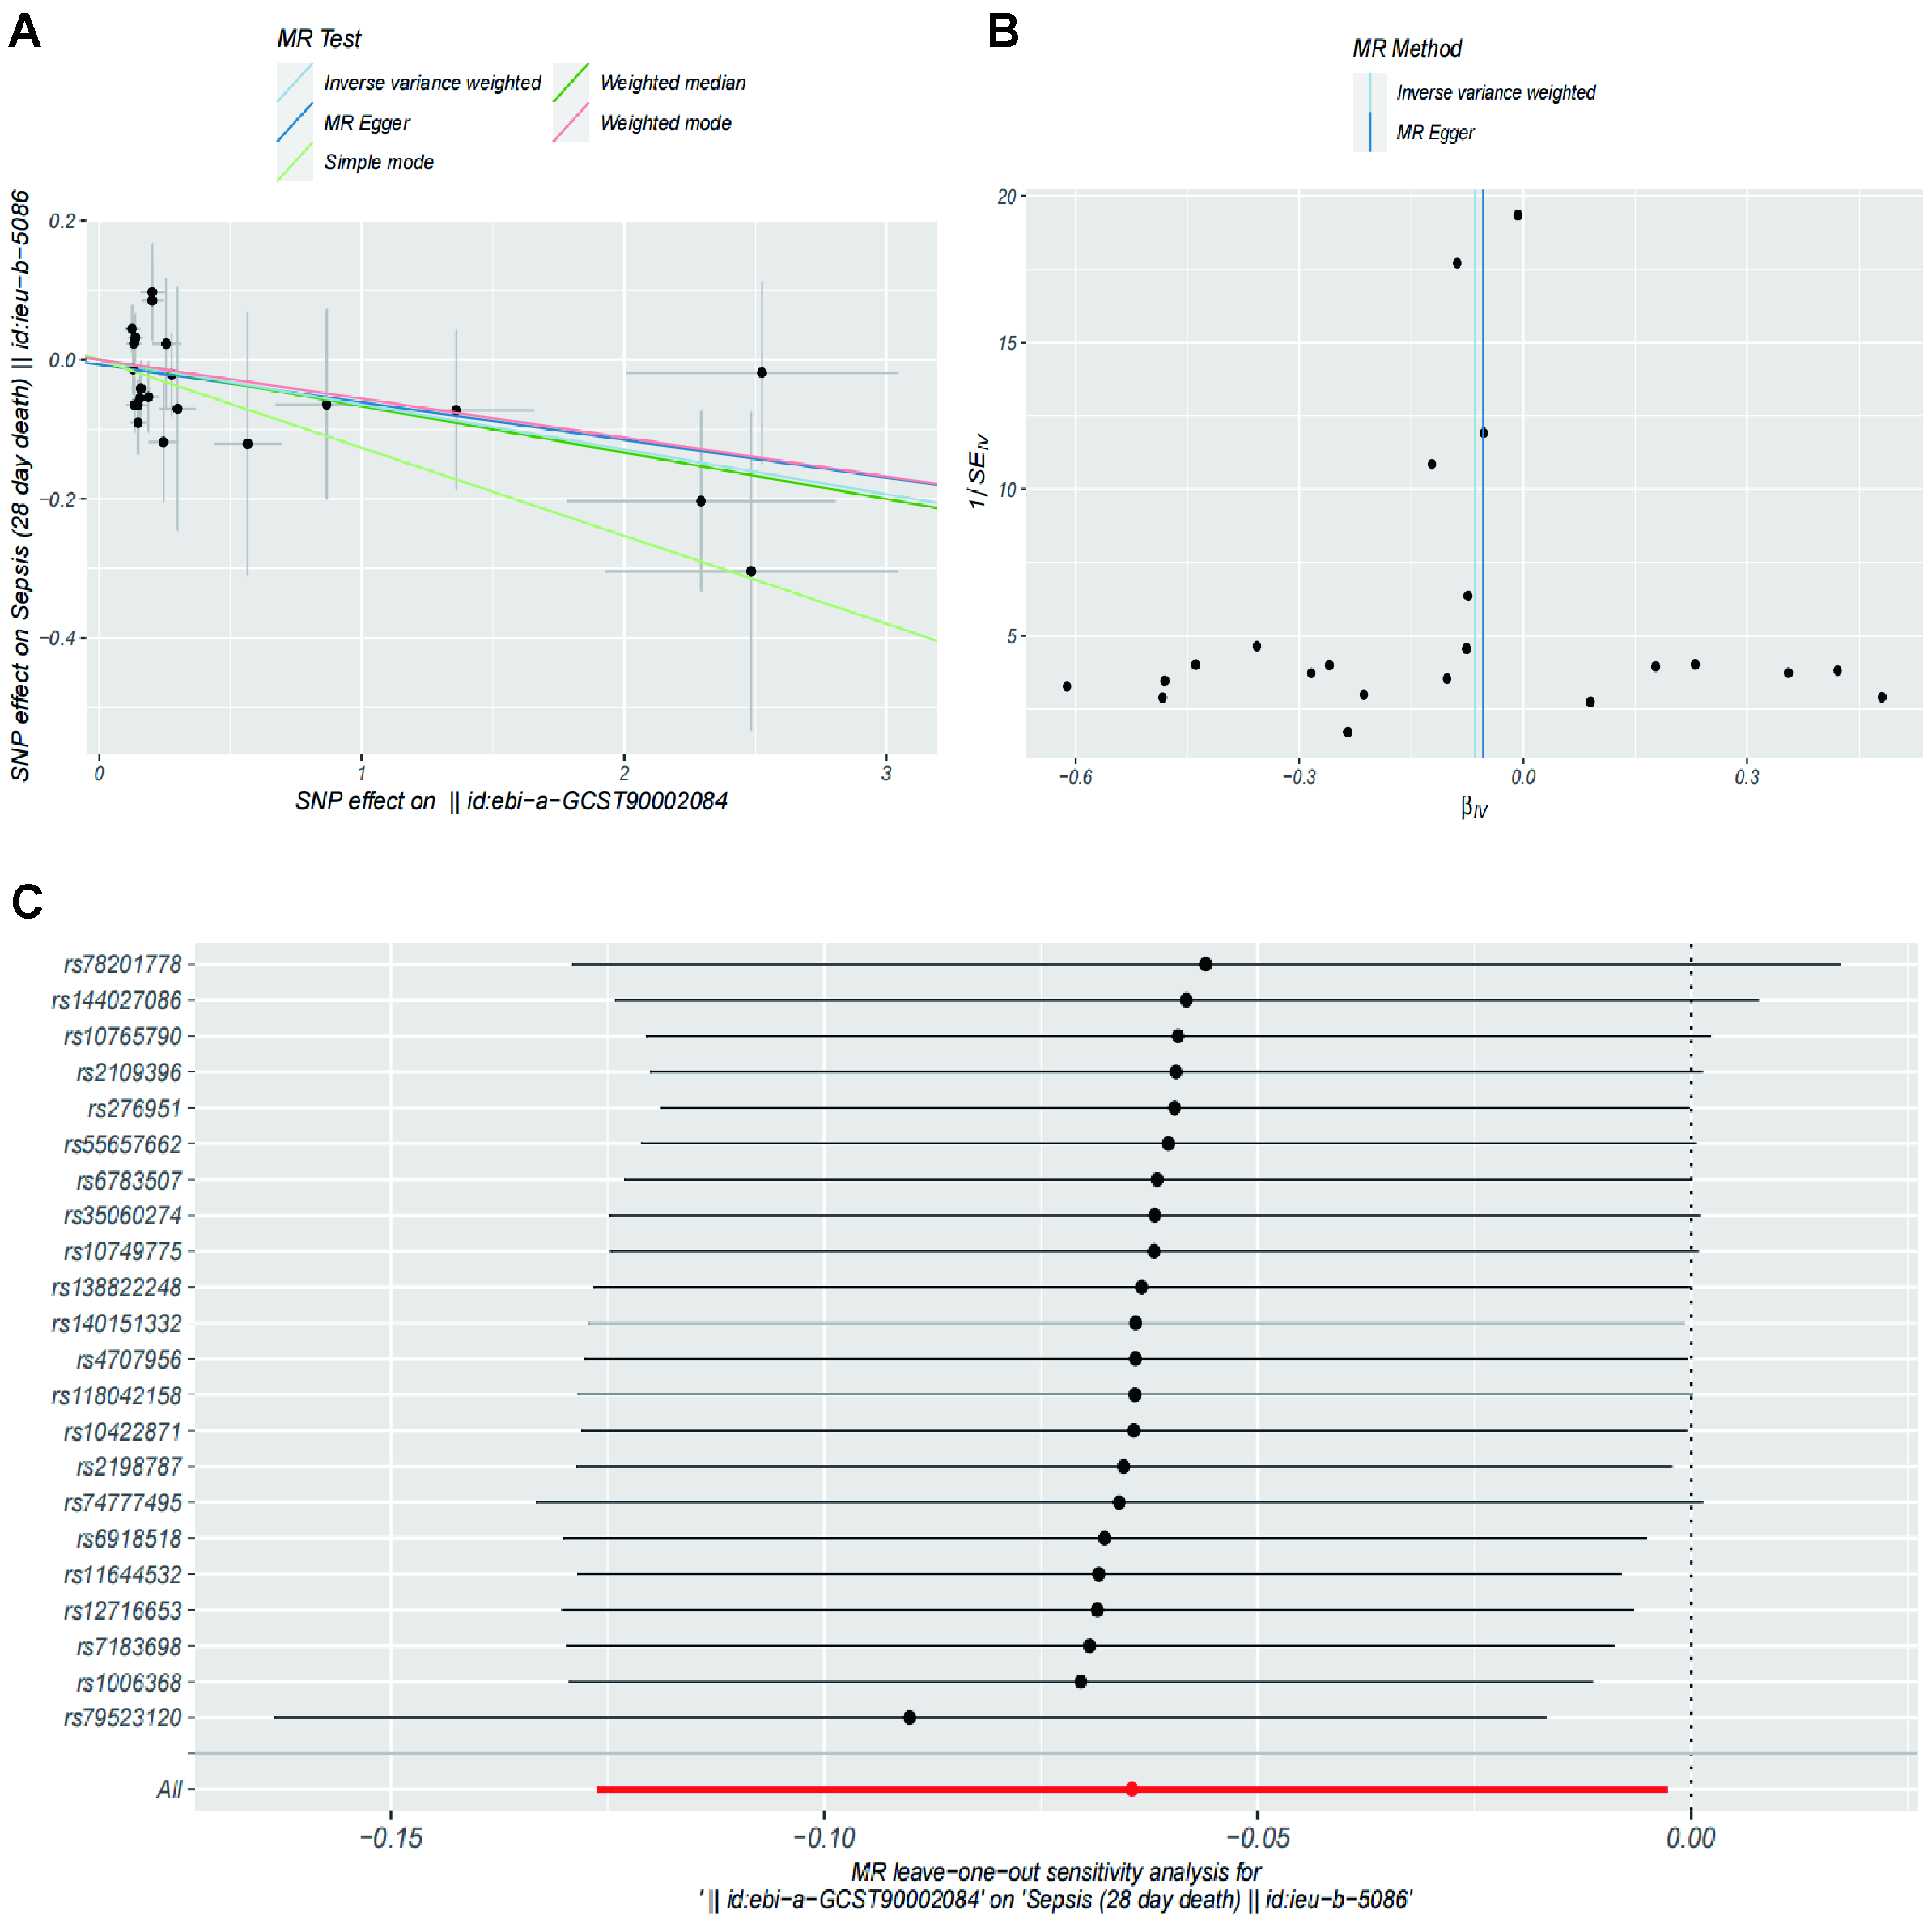


Figure S1 (A) Scatter plots for casual associations between SSC-A on NKT and sepsis 28-day mortality. (B) Funnel plots for casual associations between SSC-A on NKT and sepsis 28-day mortality. (C) Leave-one-out sensitivity analysis of the association of SSC-A on NKT on sepsis 28-day mortality.


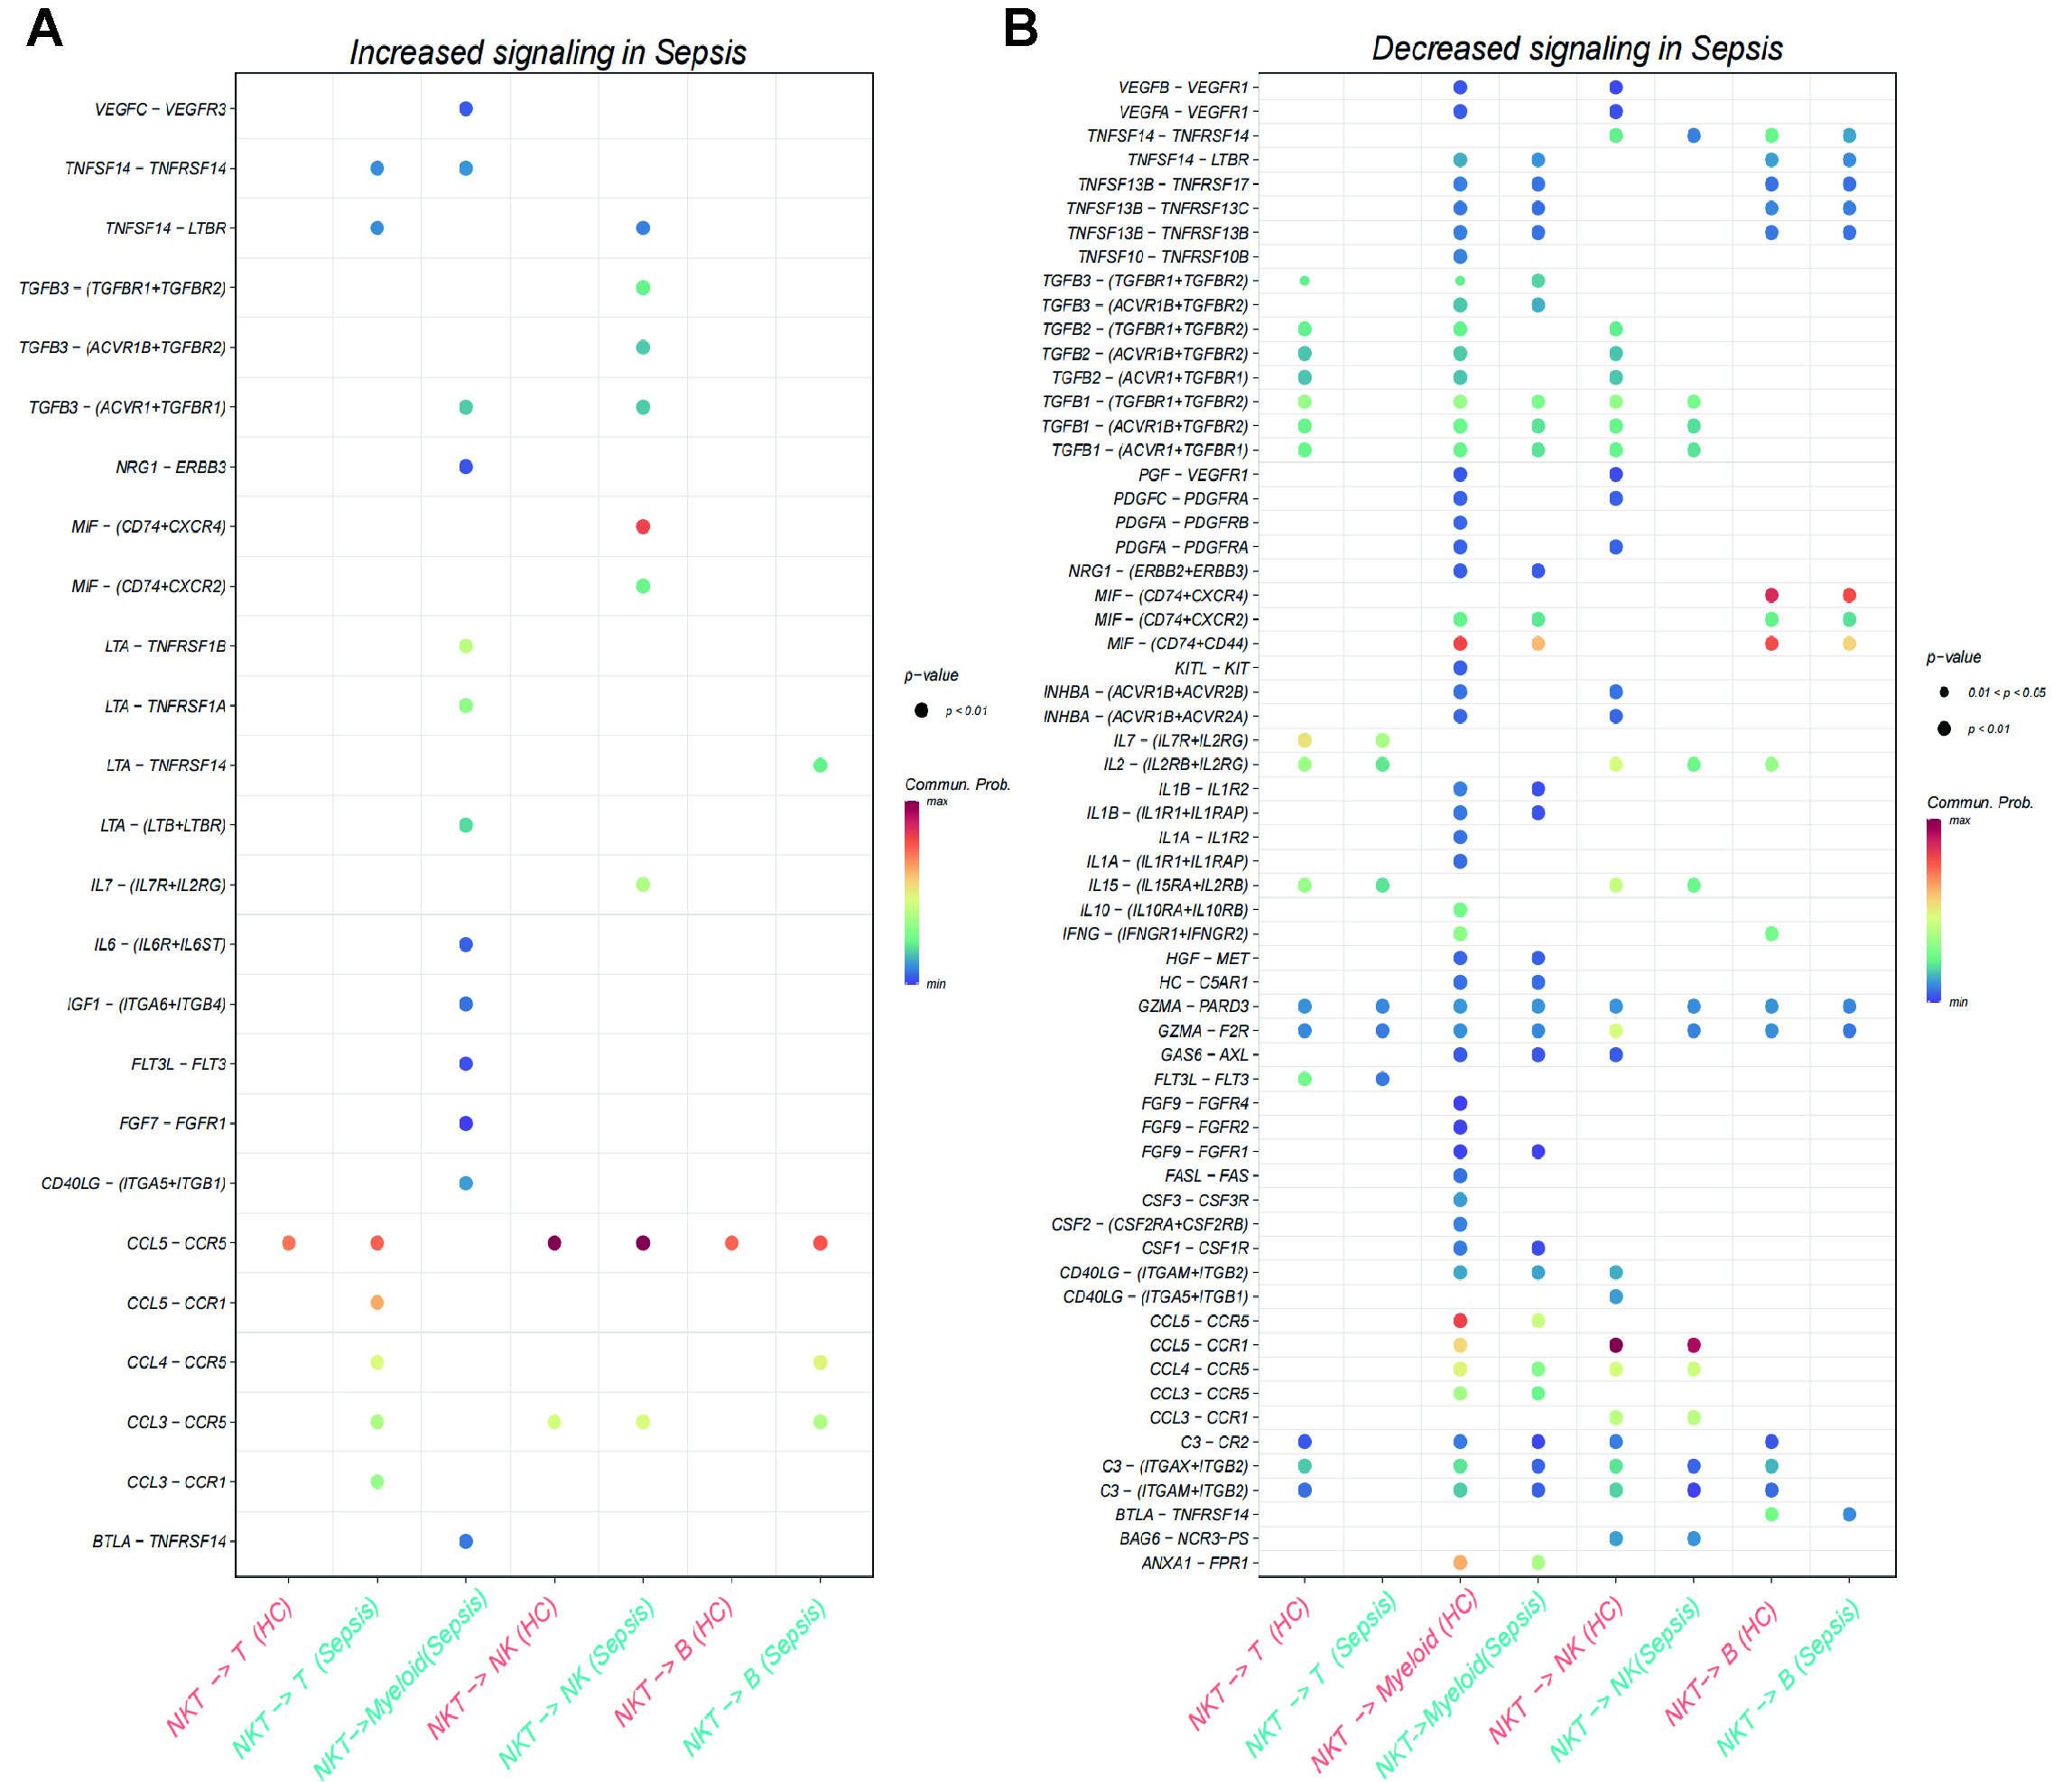


Figure S2 The communicated probability and related P values of the selected ligand-receptor interactions between NKT cells and other immune cell types within the sepsis. Dot color reflects communication probabilities and dot size represents computed p-values. P < 0.05 refers to the significant ligand-receptor interaction.

Table S1 Heterogeneity test

| **id.exposure** | **id.outcome** | **outcome** | **exposure** | **method** | **Q** | **Q_df** | **Q_pval** |
| --- | --- | --- | --- | --- | --- | --- | --- |
| ebi-a-GCST90002084 | ieu-b-5086 | Sepsis (28-day death) | SSC-A on NKT | MR Egger | 24.85 | 20 | 0.207 |
| ebi-a-GCST90002084 | ieu-b-5086 | Sepsis (28-day death) | SSC-A on NKT | IVW | 25.13 | 21 | 0.241 |

Table S2 Pleiotropy test

| **id.exposure** | **id.outcome** | **outcome** | **exposure** | **egger-intercept** | | **se** | **pval** |
| --- | --- | --- | --- | --- | --- | --- | --- |
| ebi-a-GCST90002084 | ieu-b-5086 | Sepsis (28-day death) | SSC-A on NKT | -0.006961298 | 0.01446582 | | 0.65355804 |
